# Supplementary material for: Next-Generation Proteomics of Brain Extracellular Vesicles in Schizophrenia Provide New Clues on the Altered Molecular Connectome
Source: MDPI journal article supplement (doi:10.3390/biomedicines12010129), 2024-01-08
Supplement: s1 [file s1]

## Summary Table:

| Content                                                                                                                                                                         | Page            |
|---------------------------------------------------------------------------------------------------------------------------------------------------------------------------------|-----------------|
| <b>Supplementary Table S1:</b> Proteins exclusively identified in brain extracellular vesicles (bEVs) of subjects affected by Schizophrenia (SZ) in all analyzed brain regions. | S3              |
| <b>Supplementary Table S2:</b> Proteins exclusively identified in brain extracellular vesicles (bEVs) of control (C) subjects in all analyzed brain regions.                    | S6              |
| <b>Supplementary Table S3:</b> Proteins exclusively identified in bEVs of the PFC region in SZ.                                                                                 | S14             |
| <b>Supplementary Table S4:</b> Proteins exclusively identified in bEVs of the HC in SZ.                                                                                         | S17             |
| <b>Supplementary Table S5:</b> Proteins exclusively identified in bEVs of the CAU in SZ.                                                                                        | S25             |
| <b>Supplementary Dataset S1:</b> List of identified proteins in bEVs of C brains in each brain region.                                                                          | Additional file |
| <b>Supplementary Dataset S2:</b> List of identified proteins in bEVs of SZ samples in each brain region.                                                                        | Additional file |
| <b>Supplementary Dataset S3:</b> List of identified proteins in bEVs of Control and SZ samples common to all brain regions.                                                     | Additional file |
| <b>Supplementary Dataset S4:</b> Data of the connectome analysis shown in Figure 4.                                                                                             | Additional file |

**Supplementary Table S1.** Proteins exclusively identified in brain extracellular vesicles (bEVs) of subjects affected by Schizophrenia (SZ) in all analyzed brain regions.

| Protein        | PFC        |            | HC         |            | CAU        |            |
|----------------|------------|------------|------------|------------|------------|------------|
|                | Mean       | SD         | Mean       | SD         | Mean       | SD         |
| TUBB8B         | 64,6666667 | 56,0119035 | 121        | 10,5830052 | 73,3333333 | 63,5400136 |
| H7C0C1         | 4          | 4,58257569 | 1,33333333 | 1,15470054 | 6,33333333 | 4,04145188 |
| GNG3           | 14,6666667 | 13,3166562 | 5,33333333 | 8,38649708 | 4,33333333 | 6,65832812 |
| ATP6V1E1       | 7,66666667 | 6,65832812 | 5,66666667 | 4,04145188 | 2,66666667 | 2,51661148 |
| CDC5L          | 1          | 1          | 2,66666667 | 0,57735027 | 2          | 1          |
| ADGRL1         | 1,33333333 | 1,52752523 | 2,33333333 | 1,52752523 | 1,66666667 | 0,57735027 |
| STX16-NPEPL1 2 |            | 1,73205081 | 5          | 1          | 2,66666667 | 0,57735027 |
| STX16          | 2          | 1,73205081 | 5          | 1          | 2,66666667 | 0,57735027 |
| SRSF3          | 1,33333333 | 1,52752523 | 1,33333333 | 1,52752523 | 0,66666667 | 0,57735027 |
| CSNK1E         | 2,66666667 | 2,30940108 | 2,66666667 | 2,51661148 | 0,66666667 | 0,57735027 |
| HNRNPR         | 3          | 3,60555128 | 3,66666667 | 0,57735027 | 3,66666667 | 1,52752523 |
| ZDHHC5         | 2,66666667 | 2,51661148 | 3,66666667 | 0,57735027 | 1,66666667 | 1,52752523 |
| EEF1B2         | 1          | 1          | 2          | 1          | 1,33333333 | 0,57735027 |
| RPLP1          | 2,66666667 | 3,05505046 | 1,33333333 | 1,15470054 | 2,66666667 | 3,05505046 |
| CRAT           | 5          | 7,81024968 | 1,33333333 | 1,52752523 | 3,33333333 | 2,88675135 |
| SLC2A13        | 2,33333333 | 2,081666   | 2          | 1,73205081 | 0,66666667 | 0,57735027 |
| CACNA1B        | 1          | 0          | 1,33333333 | 0,57735027 | 1,66666667 | 1,52752523 |
| CD44           | 0,66666667 | 0,57735027 | 8          | 3          | 5          | 5,29150262 |
| KBTBD11        | 3          | 2,64575131 | 4          | 1,73205081 | 2          | 1          |
| RPS8           | 2          | 2,64575131 | 1,33333333 | 0,57735027 | 0,66666667 | 0,57735027 |
| LMNA           | 13         | 20,7846097 | 0,66666667 | 0,57735027 | 1,33333333 | 1,52752523 |
| PHLPP1         | 1,33333333 | 1,15470054 | 0,66666667 | 0,57735027 | 1          | 1          |

|            |            |            |            |            |            |            |
|------------|------------|------------|------------|------------|------------|------------|
| PTPN23     | 0,66666667 | 0,57735027 | 5,33333333 | 1,52752523 | 2          | 1          |
| ETFA       | 4,66666667 | 5,03322296 | 6,33333333 | 2,88675135 | 2,33333333 | 1,15470054 |
| FAM120C    | 2          | 1,73205081 | 2          | 1          | 1,33333333 | 0,57735027 |
| JUND       | 3          | 3,60555128 | 1          | 1          | 2,33333333 | 2,081666   |
| PRAF2      | 1          | 1          | 1,33333333 | 1,15470054 | 0,66666667 | 0,57735027 |
| EIF4G1     | 2,33333333 | 2,081666   | 4          | 3,46410162 | 3,33333333 | 4,163332   |
| CCT2       | 4          | 5,29150262 | 13         | 9,53939201 | 4          | 2,64575131 |
| CTSL       | 4,33333333 | 3,7859389  | 2,33333333 | 2,51661148 | 2,66666667 | 2,51661148 |
| CNDP2      | 10,3333333 | 11,6761866 | 10         | 3,60555128 | 8,33333333 | 3,51188458 |
| RAB1C      | 3,66666667 | 1,15470054 | 4,66666667 | 4,163332   | 3          | 2          |
| FARSA      | 5,33333333 | 5,03322296 | 4          | 3          | 2,33333333 | 1,52752523 |
| PIN1       | 1,66666667 | 2,081666   | 4          | 1,73205081 | 1,66666667 | 2,081666   |
| CAPZA1     | 6,66666667 | 1,52752523 | 3,33333333 | 0,57735027 | 2          | 2          |
| A0A2R8YDH4 | 0,66666667 | 0,57735027 | 4,66666667 | 2,88675135 | 0,66666667 | 0,57735027 |
| TJP2       | 0,66666667 | 0,57735027 | 4,66666667 | 2,88675135 | 0,66666667 | 0,57735027 |
| FAM114A2   | 1          | 1          | 0,66666667 | 0,57735027 | 3,33333333 | 1,15470054 |
| SRGAP2     | 1,33333333 | 1,15470054 | 3,33333333 | 2,30940108 | 0,66666667 | 0,57735027 |
| DNM3       | 2,33333333 | 2,081666   | 5,33333333 | 1,52752523 | 1,33333333 | 1,15470054 |
| FMN2       | 1,33333333 | 1,52752523 | 1,33333333 | 0,57735027 | 1          | 0          |
| NUDCD3     | 3          | 3          | 2,66666667 | 0,57735027 | 2          | 2          |
| SYNPR      | 5,33333333 | 4,72581563 | 30,6666667 | 7,09459888 | 4,33333333 | 5,85946528 |
| CAMK2B     | 2,66666667 | 2,51661148 | 13         | 7,81024968 | 5,66666667 | 1,52752523 |
| TAC3       | 2,33333333 | 2,081666   | 5,33333333 | 2,51661148 | 8          | 1          |
| MAPRE3     | 4          | 3,60555128 | 7          | 3,46410162 | 5,66666667 | 5,13160144 |
| MMP17      | 2,33333333 | 2,51661148 | 1,33333333 | 0,57735027 | 1          | 1          |
| KHSRP      | 3,33333333 | 3,51188458 | 7,66666667 | 0,57735027 | 2          | 1,73205081 |

|         |            |            |            |            |            |            |
|---------|------------|------------|------------|------------|------------|------------|
| PDCD5   | 2,33333333 | 2,081666   | 5,66666667 | 1,52752523 | 2          | 2          |
| HMGB1   | 2,33333333 | 3,21455025 | 1,66666667 | 1,52752523 | 3,33333333 | 3,05505046 |
| GATD3B  | 0,66666667 | 0,57735027 | 4,33333333 | 1,52752523 | 1,33333333 | 1,15470054 |
| DYNC1H1 | 1,33333333 | 1,52752523 | 7,66666667 | 3,51188458 | 1          | 1          |
| MRVI1   | 2          | 2          | 2          | 1          | 1          | 1          |
| NBEA    | 1          | 1          | 2,66666667 | 0,57735027 | 0,66666667 | 0,57735027 |
| NLGN2   | 2,66666667 | 3,05505046 | 1,33333333 | 1,15470054 | 3          | 2          |
| HSPA12A | 1,33333333 | 1,15470054 | 3,66666667 | 2,51661148 | 1,66666667 | 1,52752523 |
| KIF21A  | 2          | 2,64575131 | 8,33333333 | 2,88675135 | 1,33333333 | 1,52752523 |
| RAD23B  | 6,33333333 | 10,1159939 | 10,3333333 | 3,7859389  | 1,66666667 | 1,15470054 |
| DNM2    | 2,66666667 | 2,30940108 | 8          | 1          | 1,66666667 | 1,52752523 |
| PKP4    | 1          | 1          | 1,33333333 | 1,15470054 | 1          | 1          |
| SH3KBP1 | 1          | 1          | 0,66666667 | 0,57735027 | 4,66666667 | 0,57735027 |
| OGDH    | 1,33333333 | 1,52752523 | 1          | 1          | 1,33333333 | 0,57735027 |
| ARHGDIA | 4,66666667 | 5,50757055 | 2,33333333 | 1,52752523 | 3          | 1          |
| FLOT2   | 0,66666667 | 0,57735027 | 8,66666667 | 1,15470054 | 4,66666667 | 2,081666   |
| MAST3   | 0,66666667 | 0,57735027 | 1          | 1          | 2          | 2,64575131 |
| CORO1A  | 5,66666667 | 8,96288644 | 4,33333333 | 4,163332   | 1          | 1          |

---

**Supplementary Table S2.** Proteins exclusively identified in brain extracellular vesicles (bEVs) of control (C) subjects in all analyzed brain regions.

| Protein  | PFC        |            | HC         |            | CAU        |            |
|----------|------------|------------|------------|------------|------------|------------|
|          | Mean       | SD         | Mean       | SD         | Mean       | SD         |
| ATP1A2   | 12,3333333 | 10,7857931 | 3,66666667 | 3,21455025 | 11,6666667 | 15,30795   |
| HSP90AB1 | 9          | 3,46410162 | 8,66666667 | 8,08290377 | 7,33333333 | 6,65832812 |
| GAP43    | 19         | 7,21110255 | 10,3333333 | 9,60902354 | 26         | 14         |
| GDI1     | 11,3333333 | 3,05505046 | 2,33333333 | 2,51661148 | 10,3333333 | 9,29157324 |
| NDRG2    | 19,6666667 | 3,51188458 | 5          | 7,81024968 | 12,3333333 | 11,2398102 |
| SEPTIN7  | 12         | 3,60555128 | 6,66666667 | 4,50924975 | 9,33333333 | 6,35085296 |
| CAPRIN1  | 25,3333333 | 5,85946528 | 6,33333333 | 7,76745347 | 11,3333333 | 7,5055535  |
| KRT6C    | 30         | 13,453624  | 34,3333333 | 36,6924152 | 29,6666667 | 38,370996  |
| KRT6A    | 30,3333333 | 14,0118997 | 33,6666667 | 35,6417358 | 29         | 37,2424489 |
| ACO2     | 5,33333333 | 0,57735027 | 2,33333333 | 2,51661148 | 7,33333333 | 2,51661148 |
| FSCN1    | 7          | 1          | 2,33333333 | 0,57735027 | 5,66666667 | 3,51188458 |
| VSNL1    | 6,66666667 | 4,04145188 | 0,66666667 | 0,57735027 | 2,66666667 | 1,52752523 |
| TFG      | 9,66666667 | 3,05505046 | 22,3333333 | 11,0151411 | 17,3333333 | 3,51188458 |
| MAP6D1   | 14,6666667 | 1,52752523 | 5,33333333 | 5,03322296 | 3,66666667 | 3,21455025 |
| GOT2     | 12         | 1          | 5,66666667 | 3,21455025 | 13,6666667 | 4,93288286 |
| UPF1     | 3,66666667 | 2,081666   | 2,33333333 | 1,15470054 | 1,66666667 | 0,57735027 |
| HSPA1B   | 11,6666667 | 7,02376917 | 3,66666667 | 3,21455025 | 8,33333333 | 7,23417814 |
| HSPA1A   | 11,6666667 | 7,02376917 | 3,66666667 | 3,21455025 | 8,33333333 | 7,23417814 |
| LGALSL   | 10,6666667 | 7,57187779 | 2,66666667 | 2,88675135 | 1,33333333 | 0,57735027 |
| HSPA5    | 7,66666667 | 2,081666   | 3,33333333 | 2,88675135 | 14,6666667 | 9,07377173 |
| SLC4A10  | 4,66666667 | 2,51661148 | 4,33333333 | 4,04145188 | 1,33333333 | 1,15470054 |

|         |            |            |             |            |             |            |
|---------|------------|------------|-------------|------------|-------------|------------|
| ITSN1   | 4,66666667 | 3,21455025 | 6,33333333  | 1,15470054 | 5           | 5          |
| ALDH2   | 4          | 2,64575131 | 0,66666667  | 0,57735027 | 6           | 6,244998   |
| DDX6    | 5,33333333 | 1,52752523 | 6           | 3,60555128 | 4,66666667  | 5,03322296 |
| NEFH    | 8          | 2,64575131 | 8,66666667  | 4,04145188 | 4,66666667  | 0,57735027 |
| KRT13   | 26         | 8,54400375 | 10          | 6,244998   | 11          | 3          |
| GDA     | 4          | 1          | 1,33333333  | 0,57735027 | 5,33333333  | 3,05505046 |
| AGFG1   | 10         | 4,58257569 | 11,66666667 | 6,65832812 | 10          | 1          |
| SYT1    | 5,33333333 | 2,88675135 | 4,33333333  | 5,13160144 | 7,33333333  | 3,7859389  |
| KRT8    | 10         | 10         | 15          | 3          | 10,66666667 | 4,04145188 |
| S100A1  | 2,33333333 | 0,57735027 | 2           | 0          | 2           | 0          |
| PTGDS   | 3,66666667 | 1,15470054 | 3,33333333  | 1,52752523 | 3,33333333  | 2,30940108 |
| RAB3C   | 6          | 1          | 3,33333333  | 0,57735027 | 3,33333333  | 3,51188458 |
| LAMTOR5 | 3,66666667 | 3,05505046 | 3           | 3          | 3,33333333  | 0,57735027 |
| GDI2    | 5,33333333 | 1,52752523 | 1,66666667  | 1,52752523 | 4           | 3,60555128 |
| HSPA9   | 5          | 1          | 2,66666667  | 2,88675135 | 8,66666667  | 4,61880215 |
| YTHDF3  | 6,66666667 | 1,15470054 | 4,33333333  | 1,15470054 | 3,66666667  | 1,15470054 |
| SYNCRIP | 2,66666667 | 1,52752523 | 4,33333333  | 1,52752523 | 2,66666667  | 3,05505046 |
| DCLK1   | 5,66666667 | 3,51188458 | 8           | 3,60555128 | 2,33333333  | 2,51661148 |
| SLC1A3  | 7,33333333 | 1,15470054 | 11          | 5,29150262 | 6,66666667  | 5,85946528 |
| LGALS1  | 5,66666667 | 3,05505046 | 6           | 1          | 10,33333333 | 4,04145188 |
| COX5B   | 10         | 4,58257569 | 6,33333333  | 6,5064071  | 9,33333333  | 3,51188458 |
| SLC9A1  | 4          | 1,73205081 | 3           | 1          | 3           | 3,60555128 |
| SCN2A   | 4,66666667 | 3,7859389  | 4           | 4,35889894 | 1,33333333  | 0,57735027 |
| CRYAB   | 4,66666667 | 4,163332   | 2,33333333  | 3,21455025 | 3,33333333  | 4,163332   |
| TPP1    | 4,66666667 | 1,15470054 | 2,33333333  | 1,15470054 | 2           | 1          |
| ACOT7   | 3          | 2,64575131 | 1,33333333  | 1,52752523 | 3           | 3          |

|         |            |            |            |            |            |            |
|---------|------------|------------|------------|------------|------------|------------|
| ATP5ME  | 2,66666667 | 1,15470054 | 2,66666667 | 2,51661148 | 1,66666667 | 1,52752523 |
| ATP6AP2 | 5          | 2,64575131 | 2,66666667 | 0,57735027 | 5,33333333 | 2,081666   |
| DDAH1   | 9,66666667 | 3,7859389  | 6          | 5,56776436 | 14,3333333 | 5,77350269 |
| EIF2S3  | 5,66666667 | 1,15470054 | 1,66666667 | 2,081666   | 2          | 1          |
| EIF2S3B | 5,66666667 | 1,15470054 | 1,66666667 | 2,081666   | 2          | 1          |
| NDUFA5  | 5,33333333 | 2,30940108 | 1,33333333 | 1,15470054 | 4,33333333 | 4,04145188 |
| KRT4    | 10,6666667 | 2,081666   | 11,6666667 | 4,04145188 | 7          | 2,64575131 |
| SYAP1   | 5          | 1,73205081 | 5          | 3,60555128 | 3,33333333 | 3,21455025 |
| UBL7    | 4,66666667 | 0,57735027 | 5          | 2,64575131 | 2,66666667 | 2,51661148 |
| KRT73   | 12         | 5          | 6,66666667 | 6,11010093 | 5,66666667 | 2,081666   |
| KRT74   | 6,33333333 | 6,02771377 | 6,66666667 | 6,11010093 | 5,66666667 | 2,081666   |
| NCL     | 6,66666667 | 2,081666   | 4          | 6,08276253 | 1,66666667 | 2,081666   |
| MRTFB   | 1,66666667 | 2,081666   | 6          | 3,46410162 | 8,33333333 | 2,081666   |
| COX7A2  | 3          | 1          | 2,33333333 | 1,15470054 | 3,33333333 | 0,57735027 |
| ADCY9   | 2,66666667 | 1,15470054 | 2,33333333 | 0,57735027 | 1,33333333 | 1,15470054 |
| EIF4H   | 5          | 3          | 2          | 2          | 4          | 2,64575131 |
| DLST    | 1,33333333 | 1,15470054 | 0,66666667 | 0,57735027 | 2,66666667 | 1,52752523 |
| DBI     | 6,33333333 | 3,21455025 | 5,33333333 | 3,7859389  | 1,66666667 | 2,081666   |
| PDIA3   | 2          | 1          | 1,33333333 | 1,52752523 | 3,33333333 | 3,51188458 |
| GORASP2 | 7,33333333 | 3,21455025 | 10,6666667 | 8,326664   | 11,3333333 | 8,08290377 |
| SKP1    | 3,66666667 | 1,52752523 | 2,33333333 | 2,51661148 | 4          | 3,60555128 |
| SMAP1   | 5,33333333 | 1,15470054 | 6          | 5          | 3,66666667 | 2,30940108 |
| IER3IP1 | 2,33333333 | 1,15470054 | 1,33333333 | 1,52752523 | 3,33333333 | 1,52752523 |
| BTF3    | 1          | 1          | 1,33333333 | 0,57735027 | 1          | 1          |
| ACTR1A  | 2,33333333 | 1,15470054 | 4,33333333 | 2,51661148 | 5,66666667 | 6,35085296 |
| DAD1    | 3,33333333 | 0,57735027 | 1          | 1          | 3,33333333 | 1,15470054 |

|         |            |            |             |            |            |            |
|---------|------------|------------|-------------|------------|------------|------------|
| CKMT1A  | 5          | 0          | 5,66666667  | 1,52752523 | 10         | 3          |
| CRH     | 4,33333333 | 3,21455025 | 1,33333333  | 1,52752523 | 1,66666667 | 1,52752523 |
| PHACTR1 | 1,66666667 | 2,081666   | 2           | 2          | 4,33333333 | 0,57735027 |
| GSN     | 5,33333333 | 2,081666   | 5           | 5,56776436 | 2,33333333 | 2,51661148 |
| S100B   | 6          | 0          | 5,66666667  | 1,52752523 | 6,33333333 | 2,51661148 |
| CDH8    | 3          | 2          | 1,66666667  | 0,57735027 | 1          | 0          |
| SH3GL2  | 5,66666667 | 4,61880215 | 4           | 3,46410162 | 4,66666667 | 3,05505046 |
| ATP5PF  | 9,33333333 | 7,5055535  | 17,33333333 | 11,06044   | 15         | 5,56776436 |
| GNG12   | 3          | 1          | 4           | 3,46410162 | 2,66666667 | 3,05505046 |
| ACTN1   | 3          | 2          | 2,33333333  | 0,57735027 | 9,66666667 | 8,326664   |
| FAM241B | 8          | 0          | 7           | 2,64575131 | 10         | 1          |
| PARK7   | 4,66666667 | 1,52752523 | 1,66666667  | 1,52752523 | 6          | 3          |
| SLC17A7 | 4,33333333 | 0,57735027 | 9,33333333  | 9,01849951 | 2,33333333 | 2,51661148 |
| AP3D1   | 2          | 1,73205081 | 7           | 4,35889894 | 3,66666667 | 2,081666   |
| KCNQ2   | 1,66666667 | 2,081666   | 3,66666667  | 2,30940108 | 1          | 1          |
| MTPN    | 2          | 0          | 2,33333333  | 2,081666   | 2,66666667 | 2,51661148 |
| SNRNP70 | 3          | 0          | 2,33333333  | 1,52752523 | 2,33333333 | 0,57735027 |
| NES     | 2,66666667 | 2,51661148 | 2,33333333  | 2,081666   | 2          | 1,73205081 |
| WDR13   | 1,66666667 | 2,081666   | 1           | 1          | 0,66666667 | 0,57735027 |
| STAM2   | 3,33333333 | 2,081666   | 1,33333333  | 1,52752523 | 1,33333333 | 1,52752523 |
| SGTB    | 3,66666667 | 2,081666   | 4           | 4          | 1,66666667 | 1,52752523 |
| NDUFS5  | 3,66666667 | 1,15470054 | 3           | 0          | 5,66666667 | 4,61880215 |
| CHGA    | 5          | 2,64575131 | 1,33333333  | 1,15470054 | 4          | 2          |
| NDUFA4  | 3          | 1,73205081 | 0,66666667  | 0,57735027 | 1,66666667 | 1,52752523 |
| SYNE1   | 4,66666667 | 0,57735027 | 1           | 1          | 2,33333333 | 2,51661148 |
| SNX2    | 1,33333333 | 1,15470054 | 3,66666667  | 1,52752523 | 4,33333333 | 2,51661148 |



|          |            |            |            |            |            |            |
|----------|------------|------------|------------|------------|------------|------------|
| SQSTM1   | 1,66666667 | 0,57735027 | 2          | 1          | 1,66666667 | 0,57735027 |
| FABP3    | 2,66666667 | 0,57735027 | 2,66666667 | 2,51661148 | 3,66666667 | 2,081666   |
| ESYT2    | 1,66666667 | 0,57735027 | 1          | 0          | 1,33333333 | 0,57735027 |
| RBMXL1   | 3          | 2,64575131 | 2          | 1,73205081 | 2          | 2,64575131 |
| ATP6V0D1 | 2,66666667 | 2,51661148 | 1          | 1          | 4          | 3,46410162 |
| WIPF3    | 1,66666667 | 1,52752523 | 22,6666667 | 18,0092569 | 5          | 2          |
| INF2     | 1,66666667 | 1,52752523 | 3,33333333 | 2,88675135 | 16         | 10,5356538 |
| COX5A    | 5,33333333 | 6,80685929 | 1          | 1          | 7,66666667 | 4,93288286 |
| GABRA1   | 2,33333333 | 2,081666   | 2          | 1          | 1          | 0          |
| PTPRZ1   | 5,33333333 | 2,51661148 | 1,66666667 | 2,081666   | 4          | 4,58257569 |
| NEDD8    | 0,66666667 | 0,57735027 | 1          | 1          | 2,66666667 | 1,52752523 |
| BCAN     | 7,66666667 | 4,163332   | 18,6666667 | 8,50490055 | 12,6666667 | 3,05505046 |
| LANCL1   | 3,66666667 | 1,15470054 | 2          | 1          | 3,33333333 | 1,52752523 |
| CHMP4B   | 3,66666667 | 4,61880215 | 1,66666667 | 1,52752523 | 4,33333333 | 3,21455025 |
| CEP170   | 2,66666667 | 1,52752523 | 2,33333333 | 1,52752523 | 1,66666667 | 2,081666   |
| SH3BGRL  | 3,66666667 | 0,57735027 | 1          | 1          | 1,66666667 | 1,52752523 |
| NCAN     | 3,33333333 | 2,081666   | 1,33333333 | 1,52752523 | 1,66666667 | 2,081666   |
| DKK3     | 1,33333333 | 0,57735027 | 1,66666667 | 0,57735027 | 3          | 1          |
| SARNP    | 3,66666667 | 1,52752523 | 2          | 2          | 2,66666667 | 2,30940108 |
| NDUFV2   | 4          | 1          | 1          | 1          | 4,33333333 | 4,50924975 |
| MT-CO2   | 1,33333333 | 0,57735027 | 2,66666667 | 1,52752523 | 2,66666667 | 1,52752523 |
| APP      | 2,33333333 | 1,52752523 | 1,66666667 | 0,57735027 | 1,33333333 | 0,57735027 |
| FABP4    | 1          | 1          | 1          | 1          | 1          | 1          |
| PMP2     | 1,33333333 | 0,57735027 | 1          | 1          | 1          | 1          |
| CD9      | 1          | 0          | 1,66666667 | 1,52752523 | 1,66666667 | 2,081666   |
| CACNB1   | 3,66666667 | 1,15470054 | 5          | 2          | 3,66666667 | 1,15470054 |

|              |            |            |            |            |            |            |
|--------------|------------|------------|------------|------------|------------|------------|
| MLC1         | 2,66666667 | 1,15470054 | 4,66666667 | 2,081666   | 3          | 0          |
| SORBS1       | 4,33333333 | 5,77350269 | 6,33333333 | 2,88675135 | 8,33333333 | 1,52752523 |
| TPM1         | 3,66666667 | 2,51661148 | 1,33333333 | 1,15470054 | 5,33333333 | 5,03322296 |
| UQCRC2       | 1,66666667 | 1,15470054 | 2          | 1          | 1,33333333 | 0,57735027 |
| THY1         | 3,66666667 | 0,57735027 | 1,66666667 | 0,57735027 | 3          | 1          |
| FTL          | 1,33333333 | 0,57735027 | 1,66666667 | 1,52752523 | 2,66666667 | 0,57735027 |
| CBL          | 3,66666667 | 1,15470054 | 3,33333333 | 0,57735027 | 4,66666667 | 0,57735027 |
| PALM2AKAP2 2 |            | 1          | 1,33333333 | 1,52752523 | 2          | 2,64575131 |
| PALM2        | 2          | 1          | 2,66666667 | 1,52752523 | 2          | 2,64575131 |
| NAPB         | 2          | 1          | 2          | 1,73205081 | 4          | 4,58257569 |
| PENK         | 1,33333333 | 1,15470054 | 22         | 33,808283  | 65,3333333 | 7,5055535  |
| PSMC1        | 2          | 0          | 0,66666667 | 0,57735027 | 1          | 1          |
| DIP2B        | 2,33333333 | 0,57735027 | 2,33333333 | 0,57735027 | 1,66666667 | 0,57735027 |
| TMED8        | 1,66666667 | 0,57735027 | 1,33333333 | 1,52752523 | 2          | 1          |
| TIMM8A       | 2          | 0          | 0,66666667 | 0,57735027 | 3          | 2          |
| SORBS2       | 3,33333333 | 0,57735027 | 5,33333333 | 3,21455025 | 13         | 3,46410162 |
| AHNAK2       | 2          | 2,64575131 | 19,6666667 | 20,0083316 | 1,66666667 | 1,52752523 |
| WASL         | 2,33333333 | 0,57735027 | 3,33333333 | 2,081666   | 2          | 1,73205081 |
| OPA1         | 1          | 1          | 1          | 1          | 1          | 1          |
| TBC1D5       | 2,33333333 | 1,15470054 | 2,33333333 | 1,52752523 | 2,33333333 | 0,57735027 |
| NLGN3        | 1,33333333 | 0,57735027 | 1          | 1          | 0,66666667 | 0,57735027 |
| GABRB3       | 1,66666667 | 1,52752523 | 1,33333333 | 1,52752523 | 1          | 1          |
| COX7A2L      | 1,33333333 | 0,57735027 | 1          | 0          | 0,66666667 | 0,57735027 |
| C12orf57     | 3,33333333 | 2,081666   | 5          | 4,35889894 | 4,33333333 | 1,52752523 |
| HSPA4        | 2,33333333 | 1,52752523 | 1          | 1          | 2          | 2          |
| PCBP2        | 2,33333333 | 1,52752523 | 1          | 1          | 0,66666667 | 0,57735027 |

|        |             |            |             |            |             |            |
|--------|-------------|------------|-------------|------------|-------------|------------|
| SEC24B | 0,66666667  | 0,57735027 | 1,33333333  | 0,57735027 | 1           | 1          |
| ATXN2L | 1           | 1          | 4           | 0          | 2,33333333  | 1,52752523 |
| SNRPC  | 1           | 1          | 1           | 0          | 1,33333333  | 1,52752523 |
| EIF5   | 1           | 1          | 1           | 1          | 1,33333333  | 0,57735027 |
| TIMM13 | 4           | 3          | 3,66666667  | 2,081666   | 2,66666667  | 1,15470054 |
| NAPG   | 1           | 1          | 1           | 1          | 3           | 3          |
| TPR    | 1           | 0          | 3,33333333  | 3,21455025 | 3           | 3,46410162 |
| CTBP1  | 0,66666667  | 0,57735027 | 1           | 1          | 2,33333333  | 1,52752523 |
| RAN    | 1,33333333  | 0,57735027 | 1           | 1          | 0,66666667  | 0,57735027 |
| GPM6B  | 1           | 1          | 3           | 2,64575131 | 1,66666667  | 1,52752523 |
| DENR   | 3           | 1          | 5,33333333  | 4,04145188 | 2           | 1          |
| CAPZB  | 0,66666667  | 0,57735027 | 1,33333333  | 1,52752523 | 0,66666667  | 0,57735027 |
| NEDD4L | 1           | 0          | 2,66666667  | 2,081666   | 2           | 0          |
| EDC4   | 2,33333333  | 2,30940108 | 1,33333333  | 1,15470054 | 2,66666667  | 3,05505046 |
| HPCA   | 0,66666667  | 0,57735027 | 2           | 1,73205081 | 6           | 3          |
| RBSN   | 2,33333333  | 1,52752523 | 1,66666667  | 0,57735027 | 1,33333333  | 1,52752523 |
| PLCB1  | 5,66666667  | 5,50757055 | 5,66666667  | 4,61880215 | 4,66666667  | 2,081666   |
| SHISA7 | 1,33333333  | 0,57735027 | 1,33333333  | 1,15470054 | 1,33333333  | 1,15470054 |
| CAPN1  | 1,33333333  | 0,57735027 | 1,33333333  | 1,15470054 | 1,66666667  | 0,57735027 |
| DCD    | 6,66666667  | 5,50757055 | 6           | 7,21110255 | 7,66666667  | 5,6862407  |
| AHSA1  | 0,66666667  | 0,57735027 | 1,33333333  | 0,57735027 | 0,66666667  | 0,57735027 |
| SRI    | 2           | 2,64575131 | 4           | 3,60555128 | 1,66666667  | 2,081666   |
| KRT16  | 23,33333333 | 24,0277617 | 13,33333333 | 11,9303534 | 10,66666667 | 9,29157324 |
| VCP    | 5           | 5          | 1,33333333  | 1,52752523 | 6,66666667  | 5,85946528 |
| TOMM70 | 2,33333333  | 2,081666   | 2           | 2,64575131 | 5           | 2          |
| LMO7   | 4           | 4,58257569 | 4           | 6,08276253 | 16,6666667  | 10,6926766 |

|          |            |            |            |            |            |            |
|----------|------------|------------|------------|------------|------------|------------|
| UBXN7    | 1,33333333 | 1,15470054 | 1,66666667 | 2,081666   | 2          | 2          |
| PPP1R21  | 1,33333333 | 1,15470054 | 3          | 2,64575131 | 2,33333333 | 2,51661148 |
| GPRC5B   | 1,33333333 | 1,52752523 | 2          | 2          | 3,66666667 | 3,51188458 |
| CCT8     | 2,33333333 | 2,51661148 | 3          | 3          | 2,66666667 | 3,05505046 |
| TPM3     | 3,66666667 | 3,51188458 | 3,33333333 | 2,081666   | 7,33333333 | 4,93288286 |
| MICOS13  | 2,33333333 | 2,081666   | 1          | 1          | 1,66666667 | 2,081666   |
| MINK1    | 1,66666667 | 1,52752523 | 7,66666667 | 4,04145188 | 3,66666667 | 1,15470054 |
| ACOT13   | 0,66666667 | 0,57735027 | 1,33333333 | 1,15470054 | 1          | 1          |
| CRKL     | 1,33333333 | 1,52752523 | 1,66666667 | 2,081666   | 1,33333333 | 0,57735027 |
| DDI2     | 0,66666667 | 0,57735027 | 1,66666667 | 0,57735027 | 1,33333333 | 0,57735027 |
| NDUFAB1  | 2          | 2          | 3          | 1,73205081 | 5          | 3          |
| PRUNE2   | 1          | 1          | 0,66666667 | 0,57735027 | 2          | 1          |
| DBNL     | 1          | 1          | 2,33333333 | 3,21455025 | 1          | 1          |
| LARP1    | 1          | 1          | 3          | 4,35889894 | 2,66666667 | 2,51661148 |
| PACS1    | 1,66666667 | 2,081666   | 2,66666667 | 2,081666   | 1          | 1          |
| RPH3A    | 4,33333333 | 5,85946528 | 0,66666667 | 0,57735027 | 0,66666667 | 0,57735027 |
| CACNA1E  | 1          | 1          | 1,33333333 | 1,52752523 | 2          | 1          |
| FABP5    | 0,66666667 | 0,57735027 | 1,66666667 | 1,52752523 | 1          | 1          |
| SCOC     | 1          | 1          | 4,66666667 | 3,21455025 | 0,66666667 | 0,57735027 |
| SHROOM3  | 1,33333333 | 1,15470054 | 1,66666667 | 1,15470054 | 0,66666667 | 0,57735027 |
| NUTF2    | 1          | 1          | 4          | 3,60555128 | 1,33333333 | 1,52752523 |
| ALDH6A1  | 0,66666667 | 0,57735027 | 1          | 1          | 1,33333333 | 1,15470054 |
| WASF3    | 1,33333333 | 1,52752523 | 3          | 1,73205081 | 1          | 1          |
| PPP1R12A | 1          | 1          | 1,33333333 | 0,57735027 | 1          | 0          |

---

**Supplementary Table S3.** Proteins exclusively identified in bEVs of the PFC region in SZ.

| Protein | PFC        |            |
|---------|------------|------------|
|         | Mean       | SD         |
| KRT6C   | 84,6666667 | 134,704615 |
| KRT6A   | 92         | 147,390637 |
| ATP6V1A | 2          | 1,73205081 |
| CSTA    | 34,6666667 | 51,6268664 |
| GLUL    | 3          | 2,64575131 |
| GDI2    | 7,33333333 | 9,45163125 |
| QDPR    | 1,66666667 | 2,081666   |
| SCN2A   | 1,33333333 | 1,52752523 |
| GORASP2 | 5,66666667 | 5,13160144 |
| S100A8  | 59,6666667 | 93,9804944 |
| ARF1    | 1,66666667 | 2,081666   |
| ARF3    | 1,66666667 | 2,081666   |
| HEXA    | 2          | 1          |
| UNC5C   | 0,66666667 | 0,57735027 |
| COX5A   | 2,66666667 | 2,30940108 |
| NEDD8   | 1,33333333 | 1,52752523 |
| CD9     | 1          | 1          |
| TLN2    | 1,33333333 | 1,15470054 |
| AP2B1   | 1,33333333 | 1,52752523 |
| PHB     | 0,66666667 | 0,57735027 |
| H3-2    | 17,6666667 | 26,3881286 |

|         |            |            |
|---------|------------|------------|
| CAPN1   | 6          | 7,81024968 |
| DCD     | 4,33333333 | 2,30940108 |
| HSPA1L  | 29         | 44,3057558 |
| TPM3    | 7,66666667 | 12,4230968 |
| CRYBG2  | 1,66666667 | 1,52752523 |
| RPH3A   | 3,66666667 | 4,72581563 |
| LRP1    | 1,33333333 | 1,15470054 |
| GNAI1   | 2          | 2,64575131 |
| SLC12A5 | 1          | 1          |
| UBAP1   | 0,66666667 | 0,57735027 |
| PAM     | 1,33333333 | 1,52752523 |
| NDUFB1  | 1          | 1          |
| PDPK1   | 0,66666667 | 0,57735027 |
| RPS19   | 0,66666667 | 0,57735027 |
| EIF3J   | 6,33333333 | 7,09459888 |
| GYG1    | 2,66666667 | 2,51661148 |
| REEP2   | 3,66666667 | 3,21455025 |
| RPL4    | 1,66666667 | 2,081666   |
| HOPX    | 3          | 3          |
| DYNC1I2 | 1,33333333 | 1,15470054 |
| DPY30   | 1,33333333 | 1,15470054 |
| EEF1G   | 4          | 4,58257569 |
| BCAS3   | 1,33333333 | 1,52752523 |
| GNAI3   | 2          | 2,64575131 |
| TCEAL5  | 1,66666667 | 1,52752523 |
| AP1B1   | 1,33333333 | 1,52752523 |

|        |            |            |
|--------|------------|------------|
| VTN    | 3,66666667 | 5,50757055 |
| CLASP1 | 0,66666667 | 0,57735027 |
| PTRHD1 | 0,66666667 | 0,57735027 |
| DCXR   | 0,66666667 | 0,57735027 |
| FGB    | 37,3333333 | 62,9311793 |
| H2AFX  | 18,6666667 | 23,4591844 |
| MSN    | 10,3333333 | 13,7961347 |
| TPM4   | 6,66666667 | 10,6926766 |
| PDLIM5 | 1          | 1          |
| ERP29  | 1,66666667 | 2,081666   |

---

**Supplementary Table S4.** Proteins exclusively identified in bEVs of the HC in SZ.

| Protein  | HC         |            |
|----------|------------|------------|
|          | Mean       | SD         |
| GAP43    | 8          | 8,54400375 |
| DCLK1    | 5,66666667 | 2,51661148 |
| SCOC     | 2,66666667 | 2,51661148 |
| SRI      | 1,66666667 | 1,52752523 |
| KCNQ2    | 3,33333333 | 0,57735027 |
| PFN2     | 1,33333333 | 1,52752523 |
| GPM6B    | 1,33333333 | 1,52752523 |
| SYNPO2   | 13,3333333 | 15,2752523 |
| SQSTM1   | 2,66666667 | 1,52752523 |
| SYNRG    | 1,33333333 | 1,52752523 |
| PKIA     | 1,66666667 | 2,081666   |
| ADCY9    | 1,33333333 | 1,52752523 |
| TSC22D2  | 3          | 3          |
| RAB3C    | 2,33333333 | 2,51661148 |
| PSMD4    | 1,66666667 | 1,52752523 |
| TMEM163  | 4,33333333 | 4,50924975 |
| MARCKSL1 | 5,33333333 | 3,7859389  |
| SGTB     | 5,66666667 | 3,05505046 |
| APOE     | 2          | 1          |
| SHC3     | 3          | 3          |
| EIF3G    | 1,66666667 | 1,52752523 |



|            |            |            |
|------------|------------|------------|
| CNKS2      | 1,33333333 | 1,52752523 |
| CEP170B    | 2          | 2,64575131 |
| LMBRD2     | 1          | 1          |
| WDR47      | 6,33333333 | 5,03322296 |
| PACS1      | 2          | 0          |
| WASF3      | 3          | 3          |
| KIAA1217   | 2          | 1          |
| NEDD4L     | 2,33333333 | 1,52752523 |
| BRAF       | 1,66666667 | 0,57735027 |
| LIMCH1     | 2          | 1          |
| STIM1      | 0,66666667 | 0,57735027 |
| VCPIP1     | 1          | 1          |
| HINT1      | 7,33333333 | 6,11010093 |
| NDUFAB1    | 2,33333333 | 2,081666   |
| SCG3       | 4,66666667 | 5,6862407  |
| HDAC4      | 4          | 1          |
| SHISA6     | 1,66666667 | 1,52752523 |
| TMEM145    | 0,66666667 | 0,57735027 |
| PALM2AKAP2 | 0,66666667 | 0,57735027 |
| PALM2      | 1,33333333 | 1,52752523 |
| SLC9A3R1   | 7,66666667 | 1,15470054 |
| SFPQ       | 1          | 1          |
| VCP        | 2,33333333 | 2,081666   |
| TBC1D5     | 0,66666667 | 0,57735027 |
| RAPGEF2    | 1          | 1          |
| OPA1       | 1          | 1          |

|         |            |            |
|---------|------------|------------|
| ASTN1   | 1,33333333 | 1,52752523 |
| USP10   | 1,33333333 | 1,15470054 |
| TPR     | 1,66666667 | 0,57735027 |
| ATP5ME  | 0,66666667 | 0,57735027 |
| ALDH6A1 | 6,33333333 | 3,51188458 |
| TACC2   | 1,33333333 | 0,57735027 |
| ERC1    | 1,66666667 | 2,081666   |
| SHROOM2 | 0,66666667 | 0,57735027 |
| ACTR1B  | 8          | 2          |
| ATOX1   | 2,33333333 | 0,57735027 |
| MINDY2  | 1,66666667 | 1,52752523 |
| ELFN1   | 1,33333333 | 1,52752523 |
| KCTD8   | 1,33333333 | 0,57735027 |
| RALBP1  | 0,66666667 | 0,57735027 |
| OSBP    | 2,66666667 | 1,15470054 |
| GRIA1   | 1,66666667 | 2,081666   |
| PTPRZ1  | 1          | 1          |
| DLG2    | 0,66666667 | 0,57735027 |
| NUP214  | 1,66666667 | 2,081666   |
| APLP1   | 2          | 1          |
| SHROOM3 | 1          | 1          |
| HARS    | 0,66666667 | 0,57735027 |
| SHISA7  | 5,33333333 | 5,50757055 |
| SORT1   | 1,66666667 | 1,15470054 |
| SRSF5   | 1,33333333 | 0,57735027 |
| UFM1    | 1,66666667 | 2,081666   |

|            |            |            |
|------------|------------|------------|
| ASAP1      | 2,66666667 | 1,15470054 |
| CAPZB      | 1          | 1          |
| MACF1      | 3          | 0          |
| NDUFV3     | 1          | 1          |
| DIDO1      | 0,66666667 | 0,57735027 |
| GIGYF2     | 1,66666667 | 1,52752523 |
| LUZP2      | 0,66666667 | 0,57735027 |
| AHSA1      | 0,66666667 | 0,57735027 |
| A0A286YES4 | 1          | 0          |
| PLPP3      | 1          | 0          |
| A0A286YF41 | 1          | 0          |
| A0A286YEZ7 | 1          | 0          |
| AFDN       | 0,66666667 | 0,57735027 |
| GLI3       | 1          | 1          |
| YTHDF2     | 3          | 2,64575131 |
| RPS3       | 2          | 2          |
| YLPM1      | 0,66666667 | 0,57735027 |
| AHSG       | 2          | 0          |
| PPP1R21    | 2,66666667 | 1,52752523 |
| EIF2S3     | 2,66666667 | 2,30940108 |
| EIF2S3B    | 2,66666667 | 2,30940108 |
| CCT4       | 4,66666667 | 2,51661148 |
| HSPA4L     | 2,33333333 | 2,081666   |
| ARHGAP23   | 2,33333333 | 0,57735027 |
| DDAH2      | 4,33333333 | 2,081666   |
| FECH       | 1,33333333 | 1,15470054 |

|          |            |            |
|----------|------------|------------|
| CCT6A    | 6          | 7,93725393 |
| HUWE1    | 2,66666667 | 2,51661148 |
| NYAP2    | 1,66666667 | 1,52752523 |
| PSAT1    | 1          | 0          |
| CNTN1    | 2          | 1          |
| CNOT3    | 2          | 2,64575131 |
| EHD1     | 2,33333333 | 1,52752523 |
| RAPH1    | 2,33333333 | 2,081666   |
| GABRA3   | 1,33333333 | 1,15470054 |
| RPS17    | 2,66666667 | 0,57735027 |
| PRKCA    | 4          | 3,60555128 |
| H0YHG0   | 3,33333333 | 2,51661148 |
| SARNP    | 3,33333333 | 2,51661148 |
| PEX5L    | 2,33333333 | 2,081666   |
| PHACTR2  | 1,33333333 | 0,57735027 |
| ARHGAP21 | 2,66666667 | 0,57735027 |
| NXF1     | 1          | 1          |
| PIANP    | 2          | 2          |
| OXCT1    | 1          | 1          |
| SDHD     | 1,66666667 | 1,15470054 |
| GLS      | 0,66666667 | 0,57735027 |
| RASA1    | 5,66666667 | 4,93288286 |
| ACTA1    | 117,666667 | 108,932701 |
| CKM      | 4,66666667 | 4,50924975 |
| STUM     | 2,66666667 | 2,51661148 |
| TEX2     | 3          | 1,73205081 |

|              |            |            |
|--------------|------------|------------|
| CAP1         | 4,33333333 | 2,88675135 |
| ATP1B1       | 1,33333333 | 1,15470054 |
| WDR1         | 3          | 3          |
| B4DLN1       | 2,33333333 | 1,52752523 |
| MRPL12       | 2,33333333 | 1,52752523 |
| ZFR          | 1          | 1          |
| ERVK3-1      | 0,66666667 | 0,57735027 |
| PMCH         | 2,66666667 | 3,05505046 |
| PPP1R3F      | 1          | 1          |
| MGST3        | 2          | 2,64575131 |
| WASH6P       | 1          | 1          |
| RAC3         | 1          | 1          |
| FKBP15       | 1,33333333 | 1,52752523 |
| PCMT1        | 3          | 3          |
| DLGAP2       | 2,66666667 | 1,15470054 |
| DLGAP4       | 2,66666667 | 1,15470054 |
| BORCS7-ASMT  | 1          | 1          |
| BORCS7       | 1          | 1          |
| COX17        | 1          | 1          |
| RGS7BP       | 0,66666667 | 0,57735027 |
| SNTA1        | 2,66666667 | 3,05505046 |
| LOC114483833 | 2,66666667 | 2,51661148 |
| H2BC1        | 2,66666667 | 2,51661148 |
| E7EVH7       | 1          | 1          |
| KLC1         | 1          | 1          |
| CACNA1A      | 1          | 0          |

|          |            |            |
|----------|------------|------------|
| UBE4B    | 2          | 1,73205081 |
| TGFB1    | 1,66666667 | 0,57735027 |
| ACBD3    | 1,33333333 | 1,52752523 |
| ADGRA1   | 1          | 1          |
| CCT3     | 1,66666667 | 1,52752523 |
| MICALL1  | 1          | 0          |
| CC2D1A   | 0,66666667 | 0,57735027 |
| OCIAD1   | 1,66666667 | 1,52752523 |
| UFC1     | 2          | 2          |
| PDLIM2   | 0,66666667 | 0,57735027 |
| E5RGS7   | 0,66666667 | 0,57735027 |
| H0YBP7   | 0,66666667 | 0,57735027 |
| H7C1D1   | 0,66666667 | 0,57735027 |
| PSMC5    | 1          | 1          |
| ADSS2    | 1          | 1          |
| F8VP03   | 0,66666667 | 0,57735027 |
| F8W031   | 0,66666667 | 0,57735027 |
| CPLX3    | 2          | 0          |
| PPP6R2   | 2,66666667 | 1,15470054 |
| UCHL3    | 1,33333333 | 1,52752523 |
| C16orf58 | 1,33333333 | 1,15470054 |
| UBE2N    | 1,33333333 | 1,52752523 |
| FASN     | 0,66666667 | 0,57735027 |
| TMEM117  | 0,66666667 | 0,57735027 |
| SLC7A8   | 0,66666667 | 0,57735027 |
| L1CAM    | 1,33333333 | 1,52752523 |

|            |            |            |
|------------|------------|------------|
| SIK3       | 0,66666667 | 0,57735027 |
| PDE1A      | 3,66666667 | 5,50757055 |
| GNAQ       | 1,33333333 | 1,52752523 |
| GLRX3      | 1          | 1          |
| PCDH7      | 0,66666667 | 0,57735027 |
| SMARCA2    | 0,66666667 | 0,57735027 |
| SKIV2L     | 1          | 1          |
| A0A1B0GU92 | 1,66666667 | 2,081666   |
| A0A1B0GU03 | 1,66666667 | 2,081666   |
| AJM1       | 0,66666667 | 0,57735027 |
| BRD4       | 0,66666667 | 0,57735027 |
| MYO5A      | 0,66666667 | 0,57735027 |
| SEC22B     | 0,66666667 | 0,57735027 |
| EXOC3L2    | 0,66666667 | 0,57735027 |
| UBXN6      | 2,66666667 | 3,7859389  |
| CLSTN1     | 1          | 1          |
| SAMD14     | 3,33333333 | 3,51188458 |
| H3BRW5     | 0,66666667 | 0,57735027 |
| SNX4       | 0,66666667 | 0,57735027 |
| STX12      | 1,33333333 | 1,52752523 |
| APOA4      | 1          | 1          |
| EIF5A      | 1          | 1          |
| EIF5A2     | 1          | 1          |
| EIF5AL1    | 1          | 1          |
| SRSF2      | 0,66666667 | 0,57735027 |
| HNRNPM     | 0,66666667 | 0,57735027 |

|         |            |            |
|---------|------------|------------|
| ACE2    | 1,66666667 | 1,52752523 |
| RAPGEF1 | 1          | 1          |
| LMOD2   | 1          | 1          |

---



**Supplementary Table S5.** Proteins exclusively identified in bEVs of the CAU in SZ.

| Protein | CAU        |            |
|---------|------------|------------|
|         | Mean       | SD         |
| PENK    | 38,6666667 | 15,6311655 |
| HSPA9   | 3,33333333 | 2,51661148 |
| GDI1    | 1,33333333 | 1,52752523 |
| TIMM13  | 1          | 1          |
| KRT79   | 5,66666667 | 5,50757055 |
| CMTM4   | 1          | 1          |
| KRT76   | 3,66666667 | 3,05505046 |
| STX1A   | 1          | 1          |
| PHACTR1 | 1,33333333 | 1,15470054 |
| STRN    | 2,66666667 | 2,51661148 |
| KRT13   | 5,66666667 | 5,13160144 |
| ARMCX2  | 1          | 0          |
| VDAC3   | 1          | 1          |
| FH      | 1          | 1          |
| HPRT1   | 0,66666667 | 0,57735027 |
| KRT73   | 1          | 1          |
| KRT74   | 1          | 1          |
| ATP5F1C | 1          | 1          |
| TIMM8A  | 1          | 1          |
| KAZN    | 2          | 1,73205081 |
| GMFB    | 1          | 1          |

|         |            |            |
|---------|------------|------------|
| FTL     | 1,33333333 | 0,57735027 |
| CALB1   | 2,33333333 | 1,52752523 |
| STK39   | 1,33333333 | 1,52752523 |
| EIF5    | 0,66666667 | 0,57735027 |
| STRN4   | 1          | 1          |
| NDUFS5  | 2          | 2,64575131 |
| BAG3    | 0,66666667 | 0,57735027 |
| POLDIP3 | 1,33333333 | 0,57735027 |
| RPL6    | 1,33333333 | 1,15470054 |
| PPP1R9A | 2,33333333 | 2,081666   |
| ZFAND2B | 1,66666667 | 0,57735027 |
| CHMP5   | 2,33333333 | 2,51661148 |
| GUCY1A2 | 1,33333333 | 1,15470054 |
| MYL10   | 1,66666667 | 1,52752523 |
| NDUFA8  | 1,66666667 | 1,52752523 |
| CANX    | 1,66666667 | 0,57735027 |
| MYO1C   | 0,66666667 | 0,57735027 |
| CKMT2   | 3          | 2          |
| HNRNPA3 | 1,66666667 | 1,52752523 |
| KATNB1  | 1          | 1          |
| GPM6A   | 0,66666667 | 0,57735027 |
| NUTF2   | 3          | 4,35889894 |
| DLAT    | 0,66666667 | 0,57735027 |
| PCDHGB4 | 0,66666667 | 0,57735027 |
| PCDHGB5 | 0,66666667 | 0,57735027 |
| SLC30A3 | 0,66666667 | 0,57735027 |

|          |            |            |
|----------|------------|------------|
| SEPTIN2  | 3          | 4,35889894 |
| PGAM4    | 9,66666667 | 5,50757055 |
| TUBAL3   | 3,66666667 | 3,51188458 |
| PCDHGB3  | 0,66666667 | 0,57735027 |
| PCDHGA12 | 0,66666667 | 0,57735027 |
| PCDHGB6  | 0,66666667 | 0,57735027 |
| PCDHGA5  | 0,66666667 | 0,57735027 |
| PCDHGA7  | 0,66666667 | 0,57735027 |
| PCDHGA2  | 0,66666667 | 0,57735027 |
| PCDHGB1  | 0,66666667 | 0,57735027 |
| PCDHGA1  | 0,66666667 | 0,57735027 |
| PCDHGC3  | 0,66666667 | 0,57735027 |
| PCDHGB2  | 0,66666667 | 0,57735027 |
| PCDHGA6  | 0,66666667 | 0,57735027 |
| PCDHGA11 | 0,66666667 | 0,57735027 |
| PCDHGA3  | 0,66666667 | 0,57735027 |
| PCDHGB7  | 0,66666667 | 0,57735027 |
| PCDHGA4  | 0,66666667 | 0,57735027 |
| PCDHGC4  | 0,66666667 | 0,57735027 |
| PCDHGA9  | 0,66666667 | 0,57735027 |
| PCDHGA10 | 0,66666667 | 0,57735027 |
| PCDHGA8  | 0,66666667 | 0,57735027 |
| CTNNA1   | 2,33333333 | 0,57735027 |
| CTNNA2   | 1,33333333 | 1,15470054 |
| LITAF    | 2,33333333 | 2,51661148 |
| SFXN5    | 1,66666667 | 2,081666   |

|             |            |            |
|-------------|------------|------------|
| CAND2       | 0,66666667 | 0,57735027 |
| SLC32A1     | 0,66666667 | 0,57735027 |
| MAN1A1      | 1          | 1          |
| SNTB2       | 0,66666667 | 0,57735027 |
| RPL7A       | 0,66666667 | 0,57735027 |
| RPS10-NUDT3 | 0,66666667 | 0,57735027 |
| ZNFX1       | 0,66666667 | 0,57735027 |
| LETM1       | 0,66666667 | 0,57735027 |
| PCNT        | 0,66666667 | 0,57735027 |
| NOS1        | 0,66666667 | 0,57735027 |
| GLUD2       | 1,66666667 | 1,52752523 |
| HDGFL3      | 1          | 1          |
| CNN1        | 0,66666667 | 0,57735027 |

---
